# Supplementary material for: A BPTTF-based self-assembled electron-donating triangle capable of C60 binding
Source: Royal Society of Chemistry journal article supplement (doi:10.1039/c2cc00065b), 2012-01-01
Supplement: c2cc00065b.pdf [file c2cc00065b.pdf]

## SUPPORTING INFORMATION

# A BPTTF-based Self-Assembled Electrodonating Triangle capable of C<sub>60</sub> binding

*Sébastien Goeb, Sébastien Bivaud, Paul Ionut Dron, Jean-Yves Balandier, Marcos Chas and Marc Sallé\**

### Table of Contents

- p. S1 : **General experimental methods – instruments**
- p. S2 : **C<sub>60</sub> titration method**
- p. S2 : **Materials**
- p. S2 : **Synthesis**
- p. S2 : **Figure S1.** Analytical data for square **3**
- p. S3 : **Figure S2.** Front view of the energy-minimized structures (MM+) of triangle **2** and square **3** and their respective cavity size
- p. S3 : **Figure S3.** Spectral changes in a UV-vis titration exp. of triangle ( $2.0 \times 10^{-5}$  M) vs C<sub>60</sub> ( $2.0 \times 10^{-3}$  M) at rt in CS<sub>2</sub> / CH<sub>2</sub>Cl<sub>2</sub> (8 / 2). Inset: Benesi-Hildebrand curve from titration (R = 0.995)
- p. S3 : **References**

#### **General experimental methods – instruments.**

Most of the spectroscopic data were obtained with the equipment facilities of the PIAM (technical platform) at the University of Angers. The 500 (<sup>1</sup>H), 202.5 (<sup>31</sup>P) and 470.6 MHz (<sup>19</sup>F) NMR spectra were recorded at room temperature using perdeuterated solvents as internal standards (<sup>1</sup>H), external H<sub>3</sub>PO<sub>4</sub> solution (<sup>31</sup>P) or CFC<sub>3</sub> (<sup>19</sup>F). Mass spectra were achieved on a ESI source spectrometer in CH<sub>3</sub>CN at the Université de Rennes 1 (CRMPO). Cyclic voltammetry experiments were carried out on a potentiostat-galvanostat with solvents and electrolyte of electrochemical grades. CV experiments were carried out at 298K in a conventional three-electrode cell equipped with a Pt disk working electrode (diameter: 1mm), a Pt wire counter electrode, and a Ag wire reference electrode calibrated using an internal ferrocen reference.

### C<sub>60</sub> titration method.

A solution (2.5 mL) of triangle **2** ( $2.0 \times 10^{-5}$  M) in CS<sub>2</sub> / CH<sub>2</sub>Cl<sub>2</sub> (80 / 20) was placed in a UV-Vis cell equipped with a septum. Aliquots of the C<sub>60</sub> solution ( $2.0 \times 10^{-3}$  M) in CS<sub>2</sub> / CH<sub>2</sub>Cl<sub>2</sub> (80 / 20) were added into the working cell and into the reference cell containing 2.5 mL of CS<sub>2</sub> / CH<sub>2</sub>Cl<sub>2</sub> (80 / 20). UV-Vis spectra were recorded at room temperature. To maintain a constant concentration the collected data were corrected from the dilution factor.

**Materials.** Methylene chloride was used as purchased. Compound **1**<sup>1</sup> and complex *dppp*Pt(OTf)<sub>2</sub><sup>2</sup> were synthesized as described in literature.

### Synthesis.

**Triangle 2:** To a mixture of *dppp*Pt(OTf)<sub>2</sub> (21.7 mg, 0.022 mmol) and compound **1** (10.0 mg, 0.022 mmol) was added CH<sub>2</sub>Cl<sub>2</sub> (30 mL). The mixture was stirred for 5 days at room temperature. The insoluble square **3** was filtered and the resulting clear solution evaporated under an air flow to give **2** (19 mg, 60%) as a brown yellow solid. <sup>1</sup>H NMR (500 MHz, acetone-d<sub>6</sub>): δ 8.86 (d, <sup>3</sup>J = 5.8 Hz, 12H), 7.88-7.79 (m, 24H) 7.48 (s, 12H), 7.46-7.39 (m, 36H), 7.31 (d, <sup>3</sup>J = 6.0 Hz, 12H), 3.46 (s(b), 12H); <sup>31</sup>P NMR (202.5 MHz, acetone-d<sub>6</sub>): -12.98 (s); <sup>19</sup>F NMR (470.6 MHz, acetone-d<sub>6</sub>): -78.63 (s); ES-MS m/z (nature of the peak): 1862.5625 ([**1**-Ptdppp]<sub>3</sub>.4TfO<sup>-</sup>)<sup>2+</sup>; Anal. Calcd for C<sub>145</sub>H<sub>114</sub>F<sub>12</sub>N<sub>12</sub>O<sub>12</sub>P<sub>6</sub>S<sub>2</sub>Pt<sub>3</sub> + 2CH<sub>2</sub>Cl<sub>2</sub> : C, 42.64; H, 2.83; N, 4.01. Found: C, 42.58; H, 3.01; N, 4.11 %.

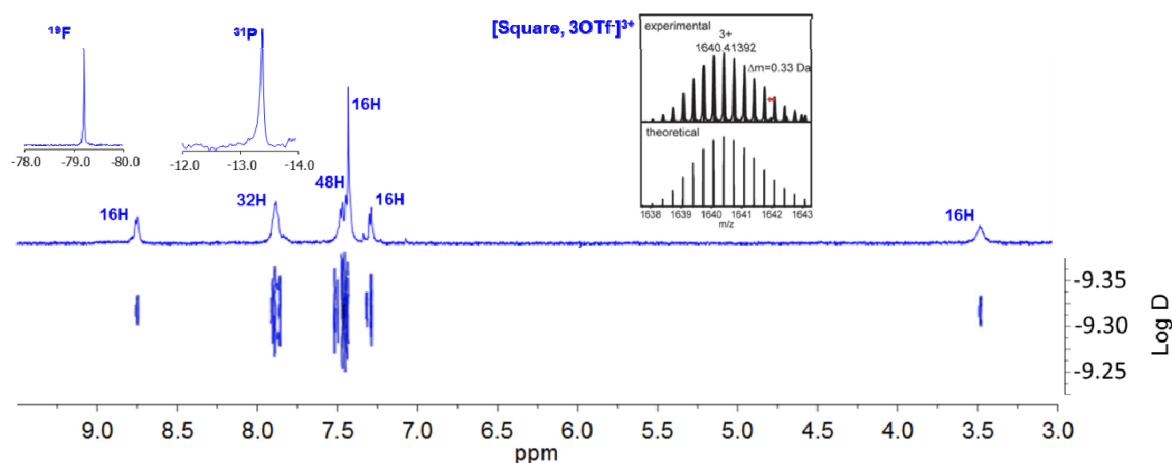

**Figure S1.** Analytical data for square **3**

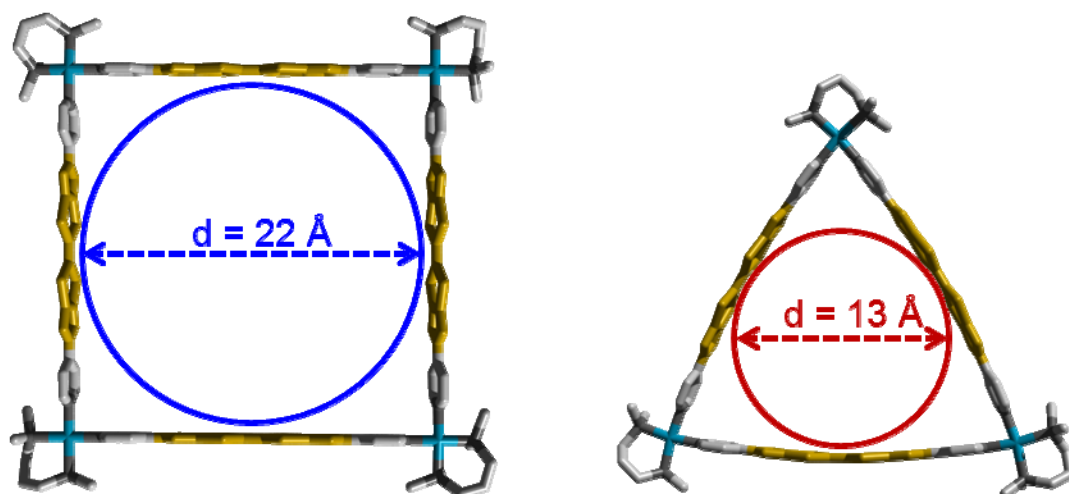

**Figure S2.** Front view of the energy-minimized structure (MM+) of square **3** and triangle **2** and their respective cavity size (the ligand *dppp* was replaced with *dmp* (1,3-bis(dimethyl phosphine)propane) for a better readability).

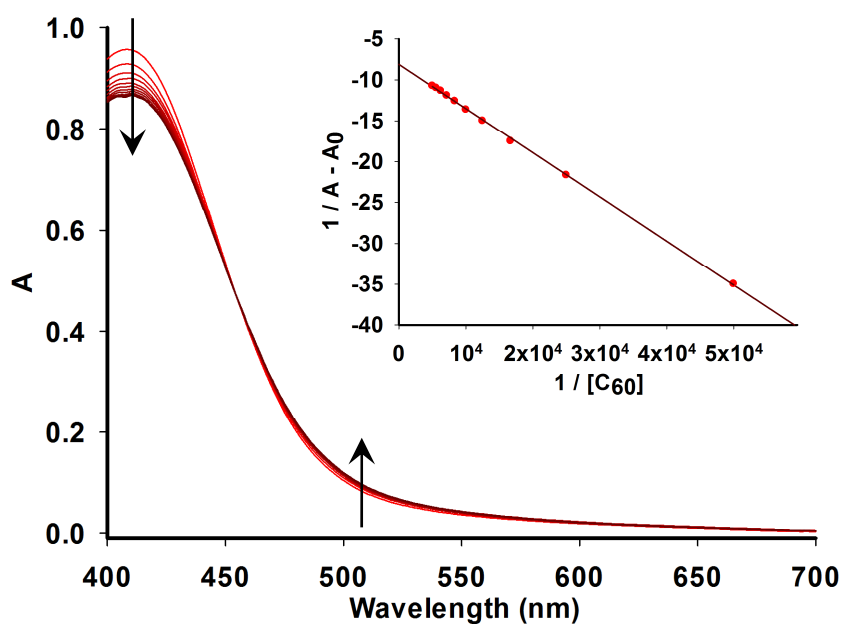

**Figure S3.** Spectral changes in a UV-vis titration exp. of triangle **2** ( $2.0 \times 10^{-5}$  M) vs  $C_{60}$  ( $2.0 \times 10^{-3}$  M) at rt in  $CS_2 / CH_2Cl_2$  (8 / 2). Inset: Benesi-Hildebrand curve from titration ( $\log K_a = 4.2$ ;  $R = 0.995$ )

#### References.

1. J. Y. Balandier, M. Chas, S. Goeb, P. I. Dron, D. Rondeau, A. Belyasmine, N. Gallego and M. Sallé, *New J. Chem.* 2011, **35**, 165.
2. P. J. Stang, D.H. Cao, S. Saito and A. M. Arif, *J. Am. Chem. Soc.* 1995, **117**, 6273.
